# Supplementary material for: Association between triage level and outcomes at Médecins Sans Frontières trauma hospital in Kunduz, Afghanistan, 2015
Source: HighWire-hosted journal article supplement (doi:10.1136/emermed-2020-209470), 2021-11-10
Supplement: emermed-2020-209470supp001_data_supplement.pdf [file emermed-2020-209470supp001_data_supplement.pdf]

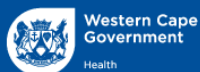

# Adult SATS Chart

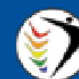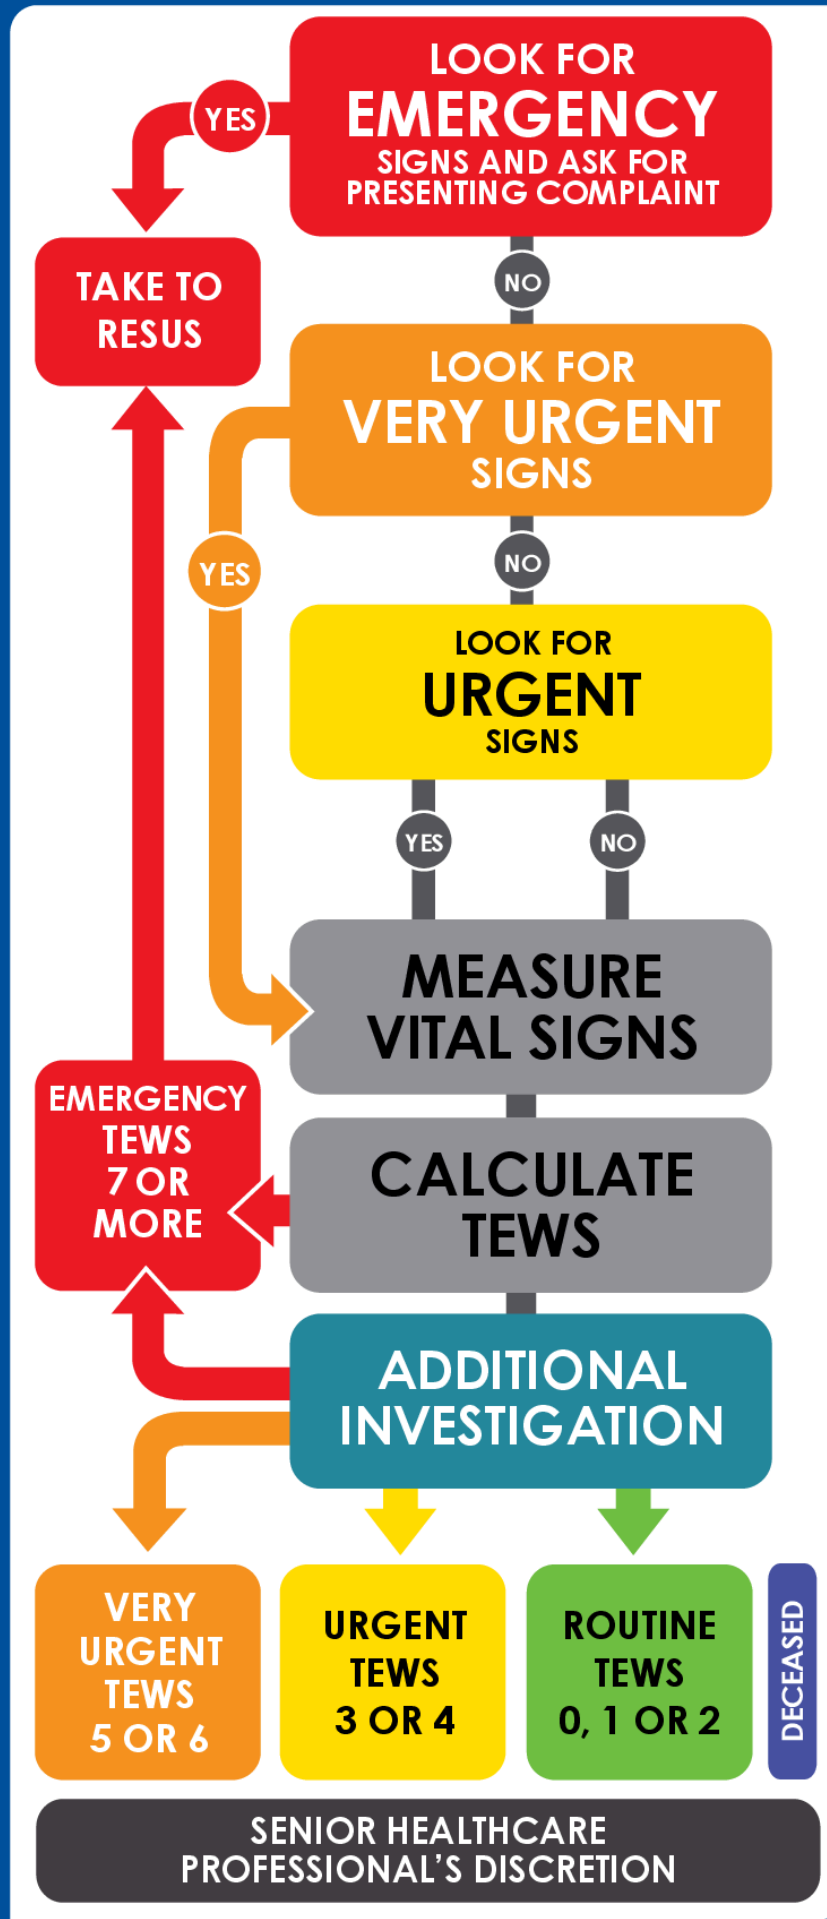

## EMERGENCY

- Obstructed Airway - not breathing
- Seizure- current
- Burn - facial / inhalation
- Hypoglycaemia - glucose less than 3
- Cardiac arrest

## VERY URGENT

- High energy transfer (severe mechanism of injury)
- Shortness of breath - acute
- Level of consciousness reduced / confused
- Coughing blood
- Chest pain
- Stabbed neck
- Haemorrhage - uncontrolled (arterial bleed)
- Seizure- post ictal
- Focal neurology - acute (stroke)
- Aggression
- Threatened limb
- Eye injury
- Dislocation of larger joint (not finger or toe)
- Fracture - compound (with a break in skin)
- Burn over 20%
- Burn - electrical
- Burn - circumferential
- Burn - chemical
- Poisoning / Overdose
- Diabetic - glucose over 11 & ketonuria
- Vomiting fresh blood
- Pregnancy and abdominal trauma
- Pregnancy and abdominal pain
- Severe pain

## URGENT

- Haemorrhage - controlled
- Dislocation of finger OR toe
- Fracture - closed (no break in skin)
- Burn - other
- Abdominal pain
- Diabetic- glucose over 17 (no ketonuria)
- Vomiting persistently
- Pregnancy and trauma
- Pregnancy and PV bleed
- Moderate pain

## ADULT TEWS

| Older than 12 years / taller than 150 cm tall |              |                   |          |             |                 |                     |               |
|-----------------------------------------------|--------------|-------------------|----------|-------------|-----------------|---------------------|---------------|
|                                               | 3            | 2                 | 1        | 0           | 1               | 2                   | 3             |
| Mobility                                      |              |                   |          | Walking     | With Help       | Stretcher/ Immobile |               |
| RR                                            |              | less than 9       |          | 9 - 14      | 15 - 20         | 21 - 29             | more than 29  |
| HR                                            |              | less than 41      | 41 - 50  | 51 - 100    | 101 - 110       | 111 - 129           | more than 129 |
| SBP                                           | Less than 71 | 71 - 80           | 81 - 100 | 101 - 199   |                 | more than 199       |               |
| Temp                                          |              | Cold OR Under 35° |          | 35° - 38.4° |                 | Hot OR Over 38.4°   |               |
| AVPU                                          |              | Confused          |          | Alert       | Reacts to Voice | Reacts to Pain      | Unresponsive  |
| Trauma                                        |              |                   |          | No          | Yes             |                     |               |

## CHECK FOR ADDITIONAL INVESTIGATIONS

|                                                               |                                                                                                                             |
|---------------------------------------------------------------|-----------------------------------------------------------------------------------------------------------------------------|
| If RR scores 1 point or more on TEWS                          | Check SpO <sub>2</sub> and hand over to SHCP to give O <sub>2</sub><br>Do a finger prick glucofetest if patient is diabetic |
| Reduced level of consciousness (not alert including confused) | Do a finger prick glucofetest and hand over to SHCP                                                                         |
| Diabetes and Hyperglycaemia (glucofetest 11 mmol/L or more)   | Urine dipstick to check for ketones                                                                                         |
| Unable to sit up/ need to lie down                            | Do a finger prick glucofetest and hand over to SHCP                                                                         |
| Chest pain                                                    | Immediate ECG and hand over to SHCP                                                                                         |
| Active seizure / fitting                                      | Do a finger prick glucofetest and hand over to SHCP<br>IV access - NO intramuscular                                         |
| History of diabetes                                           | Do a finger prick glucofetest and hand over to SHCP                                                                         |
| Hypoglycaemia (glucofetest 3 mmol/L or less)                  | Move to resus hand over to SHCP and give something to eat or drink                                                          |
| Abdominal pain or backache: female                            | Urine dipsticks and Urine pregnancy test                                                                                    |
